# Supplementary material
Source: Royal Society of Chemistry journal article supplement (doi:10.1039/d5dt03105b)
Supplement: d5dt03105b2.pdf [file d5dt03105b2.pdf]

**Table S1 Unit cell parameters for the La(III) complexes in crystalline configuration before (Initial) and after (Opt.) unit cell optimization by DFT/PBE**

| No | Complex                                                      |                 | $a$ , Å | $b$ , Å | $c$ , Å | $\alpha$ , ° | $\beta$ , ° | $\gamma$ , ° |
|----|--------------------------------------------------------------|-----------------|---------|---------|---------|--------------|-------------|--------------|
| 1  | [La(CPDK <sub>8-1</sub> ) <sub>3</sub> ] <sub>2</sub> Bpm    | Initial         | 47.58   | 28.92   | 19.35   | 90.00        | 90.00       | 120.00       |
|    |                                                              | 1 molecule Opt. | 36.83   | 14.60   | 13.24   | 74.10        | 122.76      | 142.90       |
|    |                                                              | 3 molecules MD  | 22.23   | 26.48   | 23.72   | 63.45        | 124.12      | 100.31       |
|    |                                                              | 4 molecules MD  | 26.68   | 26.48   | 23.72   | 63.45        | 83.25       | 66.61        |
| 2  | [La(CPDK <sub>8-1</sub> ) <sub>3</sub> ] <sub>2</sub> Bptz   | Initial         | 46.41   | 18.54   | 30.51   | 90.00        | 90.00       | 120.00       |
|    |                                                              | Opt.            | 26.15   | 10.27   | 16.56   | 92.41        | 90.57       | 122.15       |
| 3  | [La(CPDK <sub>8-1</sub> ) <sub>3</sub> ] <sub>2</sub> BibzIm | Initial         | 50.07   | 18.37   | 30.81   | 90.00        | 90.00       | 120.00       |
|    |                                                              | Opt.            | 26.56   | 9.79    | 16.89   | 88.21        | 90.34       | 119.85       |
| 4  | [La(CPDK <sub>8-1</sub> ) <sub>3</sub> ] <sub>2</sub> Dpop   | Initial         | 46.60   | 18.32   | 31.78   | 90.00        | 90.00       | 120.00       |
|    |                                                              | Opt.            | 25.50   | 10.17   | 17.75   | 88.12        | 91.67       | 122.05       |
| 5  | [La(CPDK <sub>8-1</sub> ) <sub>3</sub> ] <sub>2</sub> Tpp    | Initial         | 51.26   | 16.91   | 39.55   | 90.00        | 90.00       | 120.00       |
|    |                                                              | Opt.            | 27.31   | 9.19    | 20.33   | 89.41        | 88.97       | 121.64       |

**Table S2 The calculated vertical energies of the lowest triplet ( $T_1$ ) and singlet ( $S_1$ ) excited states, intramolecular energy transfer ( $W_{ET}$ ) and back transfer ( $W_{BT}$ ) rates**

| No | Complex                                                               | $S_1$ , eV | $T_1$ , eV | Channels                  | $W_{ET}$ , s <sup>-1</sup> | $W_{BT}$ , s <sup>-1</sup> |
|----|-----------------------------------------------------------------------|------------|------------|---------------------------|----------------------------|----------------------------|
| 1  | [Eu(CPDK <sub>8-1</sub> ) <sub>3</sub> ] <sub>2</sub> Bpm             | 3.869      | 2.650      | $T_1 \rightarrow {}^5D_1$ | $6.02 \cdot 10^6$          | $4.29 \cdot 10$            |
|    |                                                                       |            |            | $T_1 \rightarrow {}^5D_4$ | $7.46 \cdot 10^{-3}$       | $3.58 \cdot 10^{10}$       |
| 2  | [Tb(CPDK <sub>8-1</sub> ) <sub>3</sub> ] <sub>2</sub> Bpm             | 3.785      | 2.646      | $T_1 \rightarrow {}^5D_1$ | $5.18 \cdot 10^6$          | $5.52 \cdot 10$            |
|    |                                                                       |            |            | $T_1 \rightarrow {}^5D_4$ | $4.55 \cdot 10^{-3}$       | $3.26 \cdot 10^{10}$       |
| 3  | [Eu(CPDK <sub>8-1</sub> ) <sub>3</sub> ] <sub>2</sub> Bptz            | 2.706      | 2.129      | $T_1 \rightarrow {}^5D_1$ | $2.24 \cdot 10^8$          | $2.54 \cdot 10^{10}$       |
|    |                                                                       |            |            | $T_1 \rightarrow {}^5D_4$ | $5.43 \cdot 10^{-3}$       | $4.13 \cdot 10^{17}$       |
|    |                                                                       |            |            | $S_1 \rightarrow {}^5D_4$ | $6.15 \cdot 10^5$          | $1.10 \cdot 10^4$          |
| 4  | [Tb(CPDK <sub>8-1</sub> ) <sub>3</sub> ] <sub>2</sub> Bptz            | 2.709      | 2.132      | $T_1 \rightarrow {}^5D_1$ | $2.02 \cdot 10^8$          | $2.28 \cdot 10^{10}$       |
|    |                                                                       |            |            | $T_1 \rightarrow {}^5D_4$ | $4.99 \cdot 10^{-3}$       | $3.79 \cdot 10^{17}$       |
|    |                                                                       |            |            | $S_1 \rightarrow {}^5D_4$ | $5.66 \cdot 10^5$          | $1.14 \cdot 10^4$          |
| 5  | [Eu(CPDK <sub>8-1</sub> ) <sub>3</sub> ] <sub>2</sub> BibzIm          | 3.486      | 2.553      | $T_1 \rightarrow {}^5D_1$ | $2.45 \cdot 10^9$          | $1.31 \cdot 10^6$          |
| 6  | [Tb(CPDK <sub>8-1</sub> ) <sub>3</sub> ] <sub>2</sub> BibzIm          | 3.414      | 2.539      | $T_1 \rightarrow {}^5D_1$ | $2.35 \cdot 10^9$          | $2.19 \cdot 10^6$          |
| 7  | [Eu(CPDK <sub>8-1</sub> ) <sub>3</sub> ] <sub>2</sub> Dpop            | 3.166      | 1.930      | $T_1 \rightarrow {}^5D_1$ | $2.49 \cdot 10^7$          | $2.34 \cdot 10^9$          |
|    |                                                                       |            |            | $T_1 \rightarrow {}^5D_4$ | $5.41 \cdot 10^{-4}$       | $3.42 \cdot 10^{16}$       |
|    |                                                                       |            |            | $S_1 \rightarrow {}^5D_4$ | $1.11 \cdot 10^5$          | $6.75 \cdot 10^4$          |
| 8  | [Tb(CPDK <sub>8-1</sub> ) <sub>3</sub> ] <sub>2</sub> Dpop            | 3.175      | 1.940      | $T_1 \rightarrow {}^5D_1$ | $2.13 \cdot 10^7$          | $3.22 \cdot 10^9$          |
|    |                                                                       |            |            | $T_1 \rightarrow {}^5D_4$ | $3.83 \cdot 10^{-4}$       | $3.89 \cdot 10^{16}$       |
|    |                                                                       |            |            | $S_1 \rightarrow {}^5D_4$ | $8.63 \cdot 10^4$          | $1.99 \cdot 10^4$          |
| 9  | [Eu(CPDK <sub>8-1</sub> ) <sub>3</sub> ] <sub>2</sub> Tpp             | 3.217      | 1.975      | $T_1 \rightarrow {}^5D_1$ | $2.34 \cdot 10^7$          | $8.54 \cdot 10^{10}$       |
| 10 | [Tb(CPDK <sub>8-1</sub> ) <sub>3</sub> ] <sub>2</sub> Tpp             | 3.213      | 1.968      | $T_1 \rightarrow {}^5D_1$ | $1.83 \cdot 10^7$          | $7.43 \cdot 10^{10}$       |
| 11 | Gd(H <sub>2</sub> O) <sub>3</sub> Cl <sub>3</sub> Bpm                 | 4.060      | 2.899      | -                         | -                          | -                          |
| 12 | Gd(H <sub>2</sub> O) <sub>3</sub> Cl <sub>3</sub> Bptz                | 3.818      | 2.454      | -                         | -                          | -                          |
| 13 | Gd(H <sub>2</sub> O) <sub>3</sub> Cl <sub>3</sub> BibzIm              | 3.213      | 1.980      | -                         | -                          | -                          |
| 14 | Gd(H <sub>2</sub> O) <sub>3</sub> Cl <sub>3</sub> Dpop                | 3.119      | 2.021      | -                         | -                          | -                          |
| 15 | Gd(H <sub>2</sub> O) <sub>3</sub> Cl <sub>3</sub> Tpp                 | 3.255      | 2.275      | -                         | -                          | -                          |
| 16 | Gd(CPDK <sub>8-1</sub> ) <sub>3</sub> (H <sub>2</sub> O) <sub>2</sub> | 4.022      | 2.500      | -                         | -                          | -                          |

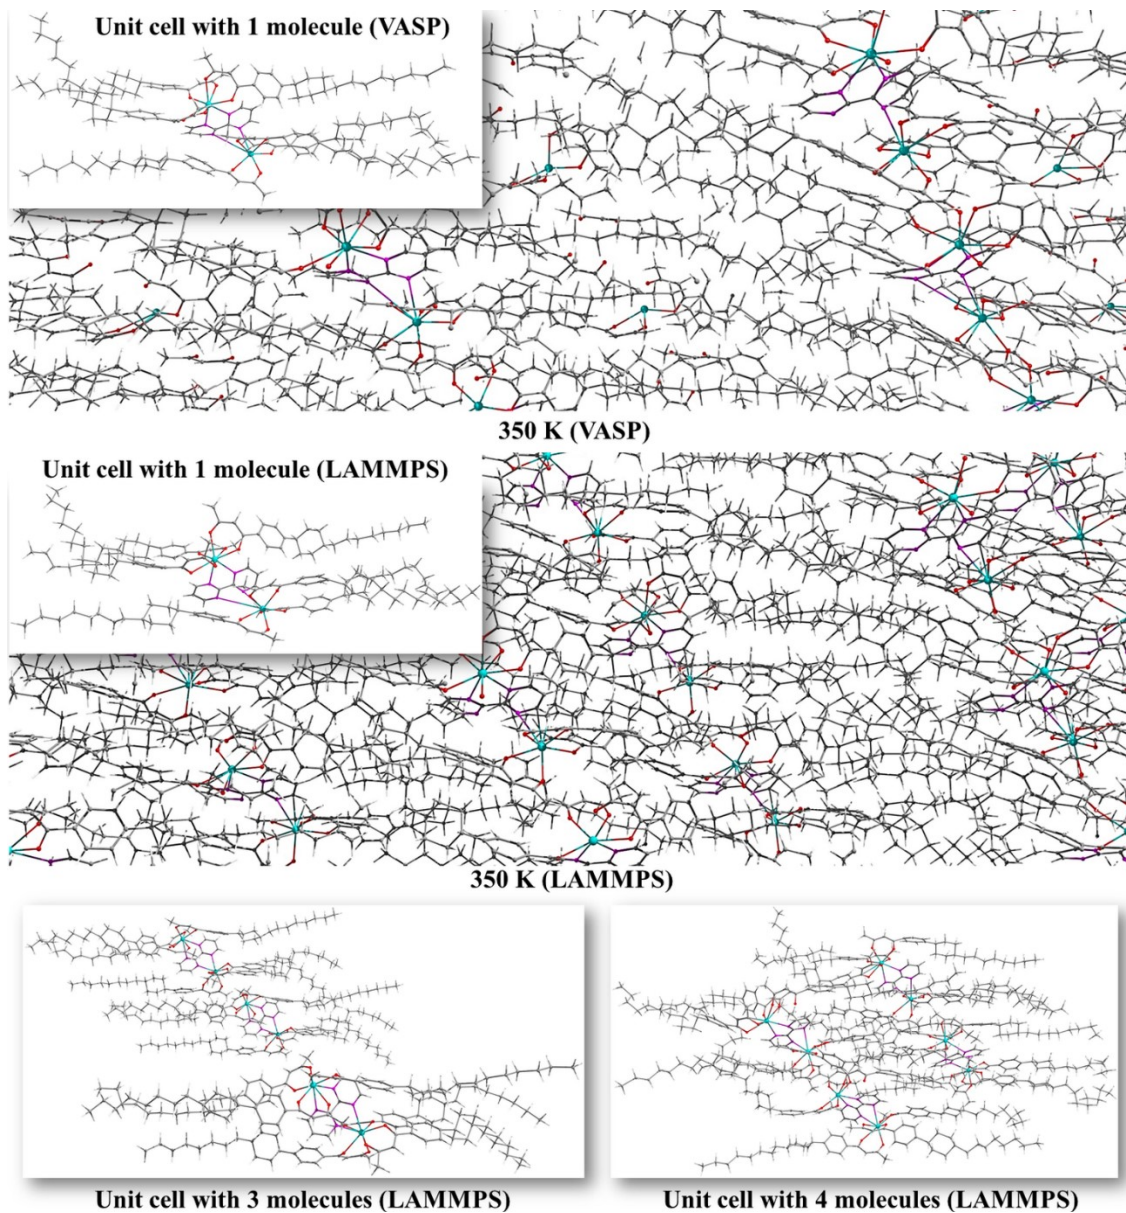

Fig. S1 Optimized geometries of crystalline configurations of the  $[La(CPDK_{8-1})_3]_2Bpm$  complex and some snapshots from the corresponding MD simulations (view from (001)).

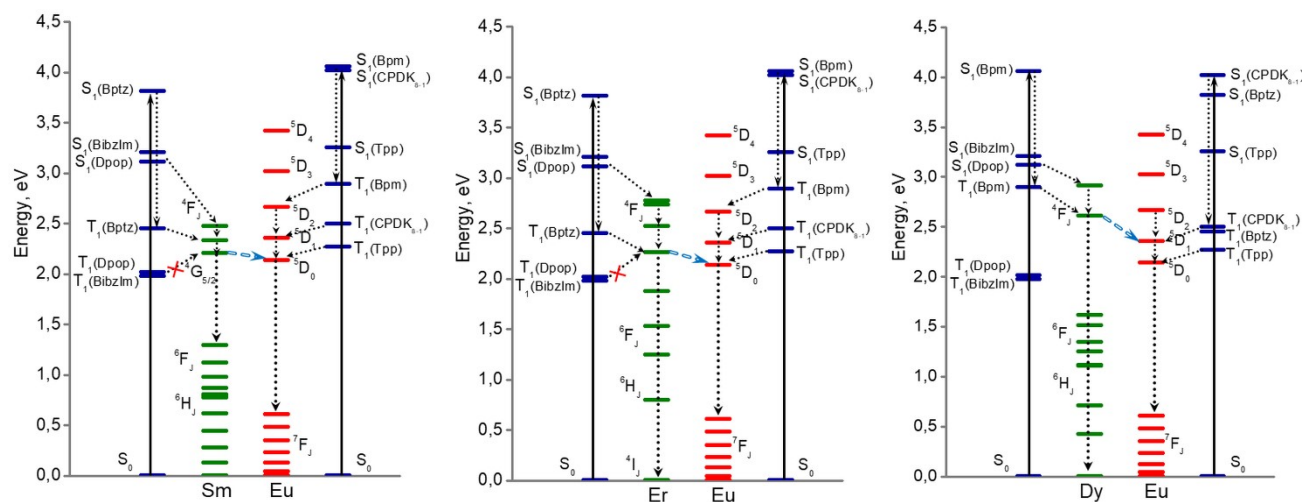

Fig. S2 The energy level diagram for the binuclear Ln complexes used in the analysis of channels of emission sensitization.
